# Supplementary material
Source: PubMed Central journal article supplement (PMC3517894)

## Supplementary Appendix

### **Trends in Survival After In-hospital Cardiac Arrests: A Report from Get With The Guidelines-Resuscitation**

Saket Girotra MD, SM; Brahmajee K. Nallamothu MD, MPH;  
John A. Spertus MD, MPH; Yan Li, PhD; Harlan M. Krumholz MD, SM;  
Paul S. Chan MD, MSc

for the *American Heart Association Get With the Guidelines – Resuscitation  
(GWTG-Resuscitation) Investigators\**

\*The American Heart Association Get With The Guidelines – Resuscitation Investigators are as follows: Vincent N. Mosesso Jr; Tim Mader; Karl B. Kern; Sam Warren; Graham Nichol; Joseph P. Ornato; Mary Ann Peberdy; Romergryko G. Geocadin; Dana P. Edelson; Comilla Sasson; Mary E. Mancini; Robert A. Berg; Emilie Allen; Elizabeth A.Hunt; Vinay M. Nadkarni; Kathy Duncan; Robert Faillace; Lana Gent

**eTable 1. Characteristics of Study Hospitals**

| <i>Hospital Characteristic, %</i>        | <b>N=374</b> |
|------------------------------------------|--------------|
| Geographic Region*                       |              |
| Northeast                                | 52 (14.6)    |
| Southeast                                | 91 (25.3)    |
| Midwest                                  | 80 (22.3)    |
| Southwest                                | 68 (18.9)    |
| West                                     | 68 (18.9)    |
| Location*                                |              |
| Urban                                    | 322 (89.7)   |
| Rural                                    | 37 (10.3)    |
| Ownership*                               |              |
| Private                                  | 47 (13.1)    |
| Government                               | 55 (15.3)    |
| Non-profit                               | 257 (71.6)   |
| Hospital Bed Size**                      |              |
| < 250                                    | 141 (39.0)   |
| 250-499                                  | 144 (39.9)   |
| ≥ 500                                    | 76 (21.1)    |
| Academic Status**                        |              |
| Hospital with fellowship program (Major) | 76 (21.1)    |
| Hospital with residency program (Minor)  | 116 (32.1)   |
| Non-teaching hospital                    | 169 (46.8)   |

\* Geographic Region, Location and Ownership data were missing for 15 (4.0%) hospitals.

\*\* Hospital Bed Size and Academic Status data were missing for 13 (3.5%) hospitals.

**eTable 2. Observed Rates of Survival and Neurological Outcomes By Calendar Year.** Unadjusted (crude) rates of survival to discharge, acute resuscitation survival, post-resuscitation survival, and neurological disability by calendar year are reported for overall cohort and by rhythm type.

|                                          | 2000            | 2001            | 2002            | 2003              | 2004              | 2005              | 2006              | 2007              | 2008              | 2009            |
|------------------------------------------|-----------------|-----------------|-----------------|-------------------|-------------------|-------------------|-------------------|-------------------|-------------------|-----------------|
| <b>OVERALL</b>                           | <b>N = 1405</b> | <b>N = 4524</b> | <b>N = 7687</b> | <b>N = 10,017</b> | <b>N = 10,794</b> | <b>N = 10,999</b> | <b>N = 10,810</b> | <b>N = 10,665</b> | <b>N = 10,959</b> | <b>N = 6765</b> |
| Survival to Discharge, n (%)             | 192<br>(13.7)   | 712<br>(15.7)   | 1219<br>(15.9)  | 1516<br>(15.1)    | 1741<br>(16.1)    | 1870<br>(17.0)    | 1859<br>(17.2)    | 1862<br>(17.5)    | 2128<br>(19.4)    | 1258<br>(18.6)  |
| Acute Resuscitation Survival†, n (%)     | 600<br>(42.7)   | 2010<br>(44.4)  | 3477<br>(45.2)  | 4678<br>(46.7)    | 5217<br>(48.3)    | 5469<br>(49.7)    | 5548<br>(51.3)    | 5783<br>(54.2)    | 6335<br>(57.8)    | 3875<br>(57.3)  |
| Post-Resuscitation Survival‡, %          | 32.0            | 35.4            | 35.1            | 32.4              | 33.4              | 34.2              | 33.5              | 32.2              | 33.6              | 32.5            |
| Neurological Outcome in Survivors        |                 |                 |                 |                   |                   |                   |                   |                   |                   |                 |
| Significant Disability# (CPC > 1), n (%) | 49<br>(32.9)    | 246<br>(46.9)   | 403<br>(42.3)   | 666<br>(51.4)     | 783<br>(54.1)     | 868<br>(51.5)     | 891<br>(52.7)     | 855<br>(52.8)     | 936<br>(49.8)     | 457<br>(40.8)   |
| Severe Disability ¶¶ (CPC > 2), n (%)    | 15<br>(10.1)    | 84<br>(16.0)    | 139<br>(14.6)   | 225<br>(17.4)     | 286<br>(19.8)     | 324<br>(19.2)     | 298<br>(17.6)     | 350<br>(21.6)     | 367<br>(19.5)     | 184<br>(16.4)   |
| <b>Asystole and PEA</b>                  | <b>N = 965</b>  | <b>N = 3315</b> | <b>N = 5940</b> | <b>N = 7866</b>   | <b>N = 8510</b>   | <b>N = 8725</b>   | <b>N = 8684</b>   | <b>N = 8578</b>   | <b>N = 8978</b>   | <b>N = 5574</b> |
| Survival to Discharge, n (%)             | 66<br>(6.8)     | 331<br>(10.0)   | 629<br>(10.6)   | 786<br>(10.0)     | 958<br>(11.3)     | 1058<br>(12.1)    | 1108<br>(12.8)    | 1140<br>(13.3)    | 1370<br>(15.3)    | 782<br>(14.0)   |
| Acute Resuscitation Survival†, n (%)     | 344<br>(35.7)   | 1279<br>(38.6)  | 2403<br>(40.5)  | 3331<br>(42.4)    | 3745<br>(44.0)    | 3985<br>(45.7)    | 4160<br>(47.9)    | 4354<br>(50.8)    | 4947<br>(55.1)    | 3019<br>(54.2)  |
| Post-Resuscitation Survival‡, %          | 19.2            | 25.9            | 26.2            | 23.6              | 25.6              | 26.6              | 26.6              | 26.2              | 27.7              | 25.9            |

|                                             | 2000           | 2001            | 2002            | 2003            | 2004            | 2005            | 2006            | 2007            | 2008            | 2009            |
|---------------------------------------------|----------------|-----------------|-----------------|-----------------|-----------------|-----------------|-----------------|-----------------|-----------------|-----------------|
| Neurological Outcome in Survivors           |                |                 |                 |                 |                 |                 |                 |                 |                 |                 |
| Significant Disability#<br>(CPC > 1), n (%) | 16<br>(34.0)   | 137<br>(56.6)   | 244<br>(50.8)   | 389<br>(58.4)   | 479<br>(61.5)   | 573<br>(61.0)   | 592<br>(59.3)   | 552<br>(56.7)   | 659<br>(54.7)   | 334<br>(48.3)   |
| Severe Disability ¶¶<br>(CPC > 2), n (%)    | 7<br>(14.9)    | 55<br>(22.7)    | 95<br>(19.8)    | 149<br>(22.4)   | 205<br>(26.3)   | 240<br>(25.5)   | 235<br>(23.5)   | 232<br>(23.8)   | 277<br>(23.0)   | 149<br>(21.6)   |
| <b>VF and Pulseless VT</b>                  | <b>N = 440</b> | <b>N = 1209</b> | <b>N = 1747</b> | <b>N = 2151</b> | <b>N = 2284</b> | <b>N = 2274</b> | <b>N = 2126</b> | <b>N = 2087</b> | <b>N = 1981</b> | <b>N = 1191</b> |
| Survival to Discharge,<br>n (%)             | 126<br>(28.6)  | 381<br>(31.5)   | 590<br>(33.8)   | 730<br>(33.9)   | 783<br>(34.3)   | 812<br>(35.7)   | 751<br>(35.3)   | 722<br>(34.6)   | 758<br>(38.3)   | 476<br>(40.0)   |
| Acute Resuscitation<br>Survival†, n (%)     | 256<br>(58.2)  | 731<br>(60.5)   | 1074<br>(61.5)  | 1347<br>(62.6)  | 1472<br>(64.5)  | 1484<br>(65.3)  | 1388<br>(65.3)  | 1429<br>(68.5)  | 1388<br>(70.1)  | 856<br>(71.9)   |
| Post-Resuscitation<br>Survival‡, %          | 49.2           | 52.1            | 54.9            | 54.2            | 53.2            | 54.7            | 54.1            | 50.5            | 54.6            | 55.6            |
| Neurological Outcome in Survivors           |                |                 |                 |                 |                 |                 |                 |                 |                 |                 |
| Significant Disability#<br>(CPC > 1), n (%) | 33<br>(32.4)   | 109<br>(38.7)   | 159<br>(33.6)   | 277<br>(44.0)   | 304<br>(45.5)   | 295<br>(39.7)   | 299<br>(43.2)   | 303<br>(46.9)   | 277<br>(40.9)   | 123<br>(28.7)   |
| Severe Disability ¶¶<br>(CPC > 2), n (%)    | 8<br>(7.8)     | 29<br>(10.3)    | 44<br>(9.3)     | 76<br>(12.1)    | 81<br>(12.1)    | 84<br>(11.3)    | 63<br>(9.1)     | 118<br>(18.3)   | 90<br>(13.3)    | 35<br>(8.2)     |

**Abbreviations:** CI, confidence interval; CPC, cerebral performance category; PEA, pulseless electrical activity; VF, ventricular fibrillation; VT, ventricular tachycardia.

† Acute Resuscitation Survival was determined by the number of patients with return of spontaneous circulation for at least 20 minutes divided by the number of patients with a cardiac arrest.

‡ Post-resuscitation Survival was determined by the number surviving to hospital discharge divided by the number surviving the acute resuscitation.

# Significant Disability was defined as the proportion of patients surviving to hospital discharge with a CPC Score of > 1.

¶¶ Severe Disability was defined as the proportion of patients surviving to hospital discharge with a CPC Score of > 2.

**eTable 3. Independent Predictors of Survival to Hospital Discharge for In-hospital**

**Cardiac Arrest.** Adjusted risk ratio, 95% confidence intervals and *P* values are provided for all model covariates included in the multivariable model for survival to discharge in the overall cohort.

| <i>Variable</i>                     | <b>Risk Ratio</b> | <b>95% CI</b> | <b><i>P</i> value</b> |
|-------------------------------------|-------------------|---------------|-----------------------|
| Calendar Year                       |                   |               |                       |
| 2001 vs. 2000                       | 1.25              | 1.08, 1.45    | 0.002                 |
| 2002 vs. 2000                       | 1.33              | 1.16, 1.52    | < 0.001               |
| 2003 vs. 2000                       | 1.30              | 1.13, 1.50    | < 0.001               |
| 2004 vs. 2000                       | 1.38              | 1.19, 1.60    | < 0.001               |
| 2005 vs. 2000                       | 1.46              | 1.25, 1.70    | < 0.001               |
| 2006 vs. 2000                       | 1.49              | 1.27, 1.76    | < 0.001               |
| 2007 vs. 2000                       | 1.55              | 1.31, 1.83    | < 0.001               |
| 2008 vs. 2000                       | 1.70              | 1.42, 2.04    | < 0.001               |
| 2009 vs. 2000                       | 1.63              | 1.35, 1.97    | < 0.001               |
| Age (per 1-year)                    | 0.99              | 0.99, 0.99    | < 0.001               |
| Sex (Female vs. Male)               | 1.06              | 1.03, 1.09    | < 0.001               |
| Race                                |                   |               |                       |
| Black vs. White                     | 0.86              | 0.82, 0.90    | < 0.001               |
| Other vs. White                     | 0.94              | 0.86, 1.03    | 0.19                  |
| Initial Cardiac Arrest Rhythm       |                   |               |                       |
| PEA vs. Asystole                    | 1.07              | 1.02, 1.13    | 0.005                 |
| VF vs. Asystole                     | 2.50              | 2.37, 2.62    | < 0.001               |
| VT vs. Asystole                     | 2.47              | 2.34, 2.61    | < 0.001               |
| Amiodarone Use during Resuscitation | 0.86              | 0.83, 0.90    | < 0.001               |
| Assessed with AED                   | 1.06              | 1.01, 1.11    | 0.02                  |
| Arrest at Night                     | 0.84              | 0.81, 0.86    | < 0.001               |
| Arrest on Weekend                   | 0.92              | 0.89, 0.94    | < 0.001               |
| Hospital Location                   |                   |               |                       |
| Monitored Unit vs. ICU              | 0.97              | 0.93, 1.01    | 0.11                  |
| Non-Monitored Unit vs. ICU          | 0.58              | 0.54, 0.62    | < 0.001               |

| <b>Variable</b>                                            | <b>Risk Ratio</b> | <b>95% CI</b> | <b>P value</b> |
|------------------------------------------------------------|-------------------|---------------|----------------|
| Hospital wide response activated                           | 0.95              | 0.89, 1.00    | 0.06           |
| CPC category on admission                                  |                   |               |                |
| CPC 2 vs. CPC 1                                            | 0.99              | 0.93, 1.04    | 0.60           |
| CPC 3 vs. CPC 1                                            | 0.87              | 0.81, 0.94    | < 0.001        |
| CPC 4 vs. CPC 1                                            | 0.74              | 0.65, 0.85    | < 0.001        |
| Heart Failure, this admission                              | 1.03              | 0.99, 1.07    | 0.13           |
| Prior Heart Failure                                        | 0.96              | 0.93, 0.99    | 0.02           |
| Myocardial Infarction, this admission                      | 1.10              | 1.05, 1.15    | < 0.001        |
| Prior Myocardial Infarction                                | 1.01              | 0.97, 1.05    | 0.52           |
| Arrhythmia                                                 | 1.20              | 1.16, 1.24    | < 0.001        |
| Hypotension                                                | 0.71              | 0.68, 0.74    | < 0.001        |
| Respiratory Insufficiency                                  | 0.99              | 0.96, 1.03    | 0.75           |
| Renal Insufficiency                                        | 0.83              | 0.80, 0.86    | < 0.001        |
| Hepatic Insufficiency                                      | 0.65              | 0.59, 0.70    | < 0.001        |
| Metabolic or Electrolyte Abnormality                       | 0.86              | 0.81, 0.91    | < 0.001        |
| Diabetes Mellitus                                          | 1.13              | 1.09, 1.16    | < 0.001        |
| Baseline Depression in CNS Function                        | 0.95              | 0.90, 0.995   | 0.03           |
| Acute Stroke                                               | 0.91              | 0.85, 0.98    | 0.02           |
| Pneumonia                                                  | 0.95              | 0.90, 0.997   | 0.04           |
| Septicemia                                                 | 0.75              | 0.71, 0.79    | < 0.001        |
| Major Trauma                                               | 0.92              | 0.83, 1.02    | 0.10           |
| Cancer                                                     | 0.58              | 0.54, 0.62    | < 0.001        |
| Mechanical Ventilation                                     | 0.65              | 0.62, 0.69    | < 0.001        |
| Intravenous Antiarrhythmic Therapy                         | 1.22              | 1.16, 1.28    | < 0.001        |
| Intravenous Vasopressor Medication                         | 0.60              | 0.57, 0.63    | < 0.001        |
| Dialysis                                                   | 0.80              | 0.72, 0.90    | < 0.001        |
| Intra-Aortic Balloon Pump                                  | 0.99              | 0.89, 1.10    | 0.85           |
| Pulmonary Artery Catheter                                  | 1.56              | 1.45, 1.67    | < 0.001        |
| Length of participation in GWTG-Resuscitation (per 1-year) | 1.01              | 0.99, 1.02    | 0.46           |

| <b>Variable</b>            | <b>Risk Ratio</b> | <b>95% CI</b> | <b>P value</b> |
|----------------------------|-------------------|---------------|----------------|
| Geographic Region          |                   |               |                |
| Southeast vs. Northeast    | 1.05              | 0.95, 1.16    | 0.32           |
| Midwest vs. Northeast      | 1.18              | 1.07, 1.30    | < 0.001        |
| Southwest vs. Northeast    | 1.03              | 0.94, 1.14    | 0.51           |
| West vs. Northeast         | 1.15              | 1.04, 1.27    | 0.005          |
| Location (Rural vs. Urban) | 1.05              | 0.97, 1.14    | 0.22           |
| Ownership status           |                   |               |                |
| Government vs. Private     | 1.00              | 0.92, 1.09    | 0.99           |
| Non-Profit vs. Private     | 1.06              | 0.99, 1.14    | 0.08           |
| Hospital Bed Size          |                   |               |                |
| 250-499 vs. < 250          | 1.10              | 1.03, 1.17    | 0.004          |
| ≥ 500 vs. < 250            | 1.11              | 1.03, 1.19    | 0.008          |
| Teaching status            |                   |               |                |
| Minor teaching vs. Major   | 0.98              | 0.92, 1.06    | 0.67           |
| Non-teaching vs. Major     | 1.00              | 0.93, 1.08    | 0.91           |

**Abbreviations:** AED, automated external defibrillator; CI, confidence interval; CNS, central nervous system; CPC, cerebral performance category; ICU, Intensive Care Unit; GWTG-Resuscitation, Get With The Guidelines-Resuscitation; PEA, pulseless electrical activity; VF, ventricular fibrillation; VT, ventricular tachycardia.

**eTable 4. Trends in Survival and Neurological Outcomes by Rhythm Type.** Risk-adjusted rates of survival to discharge, acute resuscitation survival, post-resuscitation survival, and neurological disability for each calendar year are reported separately for patients with non-shockable rhythms (asystole and PEA) and shockable rhythms (VF and pulseless VT). Rates are adjusted for temporal changes in patient and hospital characteristics.

|                                      | Risk-Adjusted Rates* |      |      |      |      |      |      |      |      |      | Adjusted RR<br>per 1-year<br>(95% CI)** | P for<br>Trend** |
|--------------------------------------|----------------------|------|------|------|------|------|------|------|------|------|-----------------------------------------|------------------|
|                                      | 2000                 | 2001 | 2002 | 2003 | 2004 | 2005 | 2006 | 2007 | 2008 | 2009 |                                         |                  |
| <b>Asystole and PEA</b>              |                      |      |      |      |      |      |      |      |      |      |                                         |                  |
| Survival to Discharge, %             | 6.8                  | 9.7  | 10.0 | 9.5  | 10.4 | 11.4 | 11.9 | 12.7 | 14.3 | 13.3 | 1.06 (1.04, 1.08)                       | < 0.001          |
| Acute Resuscitation Survival†, %     | 35.7                 | 38.4 | 39.3 | 40.5 | 41.2 | 42.9 | 44.4 | 47.2 | 50.2 | 49.0 | 1.04 (1.03, 1.05)                       | < 0.001          |
| Post-Resuscitation Survival‡, %      | 19.2                 | 25.6 | 25.8 | 23.8 | 25.6 | 27.4 | 27.4 | 27.3 | 28.9 | 27.9 | 1.02 (1.01, 1.04)                       | 0.006            |
| Neurological Outcome in Survivors, % |                      |      |      |      |      |      |      |      |      |      |                                         |                  |
| Significant Disability# (CPC > 1), % | 34.0                 | 48.4 | 43.4 | 46.2 | 46.0 | 46.6 | 44.6 | 44.0 | 45.0 | 40.1 | 0.99 (0.98, 1.01)                       | 0.21             |
| Severe Disability¶ (CPC > 2), %      | 14.9                 | 17.4 | 15.3 | 16.1 | 18.3 | 18.0 | 15.9 | 17.3 | 18.1 | 16.9 | 1.01 (0.98, 1.04)                       | 0.63             |
| <b>VF and Pulseless VT</b>           |                      |      |      |      |      |      |      |      |      |      |                                         |                  |
| Survival to Discharge, %             | 28.6                 | 32.8 | 35.2 | 36.2 | 37.3 | 37.7 | 38.0 | 37.8 | 41.7 | 41.5 | 1.03 (1.01, 1.04)                       | < 0.001          |
| Acute Resuscitation Survival†, %     | 58.2                 | 61.0 | 60.5 | 60.5 | 62.5 | 62.9 | 63.4 | 66.2 | 68.1 | 68.2 | 1.02 (1.01, 1.03)                       | < 0.001          |
| Post-Resuscitation Survival‡, %      | 49.2                 | 53.4 | 56.5 | 58.4 | 58.8 | 58.6 | 59.1 | 56.4 | 60.4 | 60.4 | 1.01 (1.00, 1.02)                       | 0.05             |
| Neurological Outcome in Survivors, % |                      |      |      |      |      |      |      |      |      |      |                                         |                  |
| Significant Disability# (CPC > 1), % | 32.4                 | 32.4 | 28.8 | 31.5 | 31.1 | 28.5 | 30.5 | 30.8 | 26.5 | 22.7 | 0.98 (0.96, 0.99)                       | 0.01             |
| Severe Disability¶ (CPC > 2), %      | 7.8                  | 7.7  | 8.6  | 8.5  | 8.7  | 8.6  | 6.4  | 12.0 | 8.7  | 7.4  | 1.02 (0.96, 1.07)                       | 0.57             |



Abbreviations: CI, confidence interval; CPC, cerebral performance category; PEA, pulseless electrical activity; RR, rate-ratio; VF, ventricular fibrillation; VT, ventricular tachycardia.

\* Risk-adjusted rates for each calendar year were obtained by multiplying the observed rate for the reference year (2000) by the corresponding rate-ratios for 2001 through 2009 from a model evaluating calendar year as a categorical variable

\*\* Determined from a model evaluating calendar year as a continuous variable

† Acute Resuscitation Survival was determined by the number of patients with return of spontaneous circulation for at least 20 minutes divided by the number of patients with a cardiac arrest.

‡ Post-resuscitation Survival was determined by the number surviving to hospital discharge divided by the number surviving the acute resuscitation.

# Significant Disability was defined as the proportion of patients surviving to hospital discharge with a CPC Score of > 1.

¶ Severe Disability was defined as the proportion of patients surviving to hospital discharge with a CPC Score of > 2.

**eTable 5. Trends in Risk-Adjusted Rates of Survival to Discharge by Calendar Year Among Patients at Hospitals Participating for at least 8 years in Get With The Guidelines-Resuscitation.** Risk-adjusted rates of survival to discharge by calendar year are reported for the overall cohort and by rhythm type for 33,464 patients at 85 hospitals that participated in the registry for at least 8 years during 2000-2009.

|                            | Risk-Adjusted Rates* |               |               |               |               |               |               |               |               |               | Adjusted RR per 1-year** (95% CI) | P for Trend** |
|----------------------------|----------------------|---------------|---------------|---------------|---------------|---------------|---------------|---------------|---------------|---------------|-----------------------------------|---------------|
|                            | 2000                 | 2001          | 2002          | 2003          | 2004          | 2005          | 2006          | 2007          | 2008          | 2009          |                                   |               |
| <b>OVERALL</b>             | <b>N=563</b>         | <b>N=1690</b> | <b>N=3202</b> | <b>N=4206</b> | <b>N=4085</b> | <b>N=4439</b> | <b>N=4409</b> | <b>N=3987</b> | <b>N=4121</b> | <b>N=2762</b> |                                   |               |
| Survival to Discharge, %   | 13.9                 | 16.2          | 17.2          | 17.7          | 20.1          | 22.1          | 21.3          | 21.8          | 24.9          | 23.7          | 1.05 (1.04, 1.07)                 | <0.001        |
| <b>Asystole and PEA</b>    | <b>N=396</b>         | <b>N=1231</b> | <b>N=2473</b> | <b>N=3296</b> | <b>N=3212</b> | <b>N=3550</b> | <b>N=3602</b> | <b>N=3261</b> | <b>N=3418</b> | <b>N=2293</b> |                                   |               |
| Survival to Discharge, %   | 8.6                  | 8.6           | 9.4           | 9.7           | 10.9          | 13.0          | 12.1          | 13.0          | 14.6          | 13.7          | 1.06 (1.04, 1.08)                 | <0.001        |
| <b>VF and Pulseless VT</b> | <b>N=167</b>         | <b>N=459</b>  | <b>N=729</b>  | <b>N=910</b>  | <b>N=873</b>  | <b>N=889</b>  | <b>N=807</b>  | <b>N=726</b>  | <b>N=703</b>  | <b>N=469</b>  |                                   |               |
| Survival to Discharge, %   | 26.4                 | 33.2          | 33.8          | 35.3          | 40.0          | 39.0          | 39.7          | 38.2          | 45.9          | 42.5          | 1.04 (1.02, 1.05)                 | <0.001        |

Abbreviations: CI, confidence interval; PEA, pulseless electrical activity; RR, rate-ratio; VF, ventricular fibrillation; VT, ventricular tachycardia.

\* Risk-adjusted rates for each calendar year were determined by multiplying the observed rate for the reference year (2000) by the corresponding rate-ratios for 2001 through 2009 from a model evaluating calendar year as a categorical variable

\*\* Determined from a model evaluating calendar year as a continuous variable

## Figure Legend

**eFigure 1. Proportion of Cardiac Arrests Due to Asystole or Pulseless Electrical Activity (PEA) and Ventricular Fibrillation (VF) or Pulseless Ventricular Tachycardia (VT) by Calendar Year.** Over the past decade, the proportion of cardiac arrests treatable by defibrillation (VF and pulseless VT) has decreased ( $P$  for trend  $<0.001$ ).

**eFigure 2. Time to Defibrillation in Patients with Ventricular Fibrillation (VF) or Pulseless Ventricular Tachycardia (VT) by Calendar Year.** Over the past decade, mean time to defibrillation among patients with VF and pulseless VT has not changed ( $P$  for trend = 0.08).

**eFigure 1. Proportion of Cardiac Arrests Due to Asystole or Pulseless Electrical Activity (PEA) and Ventricular Fibrillation (VF) or Pulseless Ventricular Tachycardia (VT) by Calendar Year.** Over the past decade, the proportion of cardiac arrests treatable by defibrillation (VF and pulseless VT) has decreased ( $P$  for trend  $<0.001$ ).

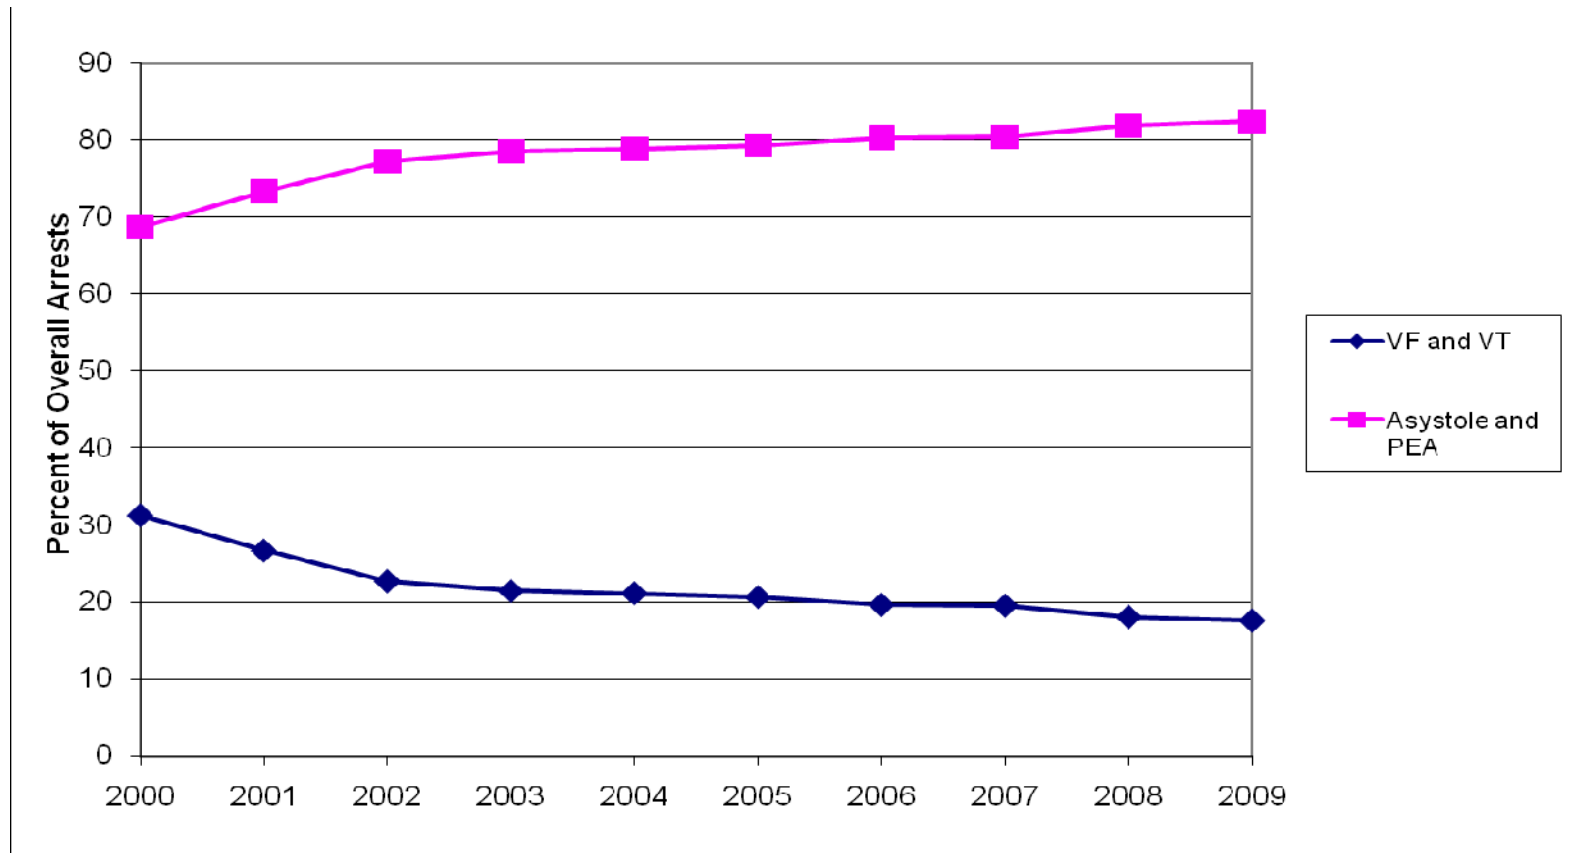

Abbreviations: PEA, pulseless electrical activity; VF, ventricular fibrillation; VT, ventricular tachycardia.

**eFigure 2. Time to Defibrillation in Patients with Ventricular Fibrillation (VF) or Pulseless Ventricular**

**Tachycardia (VT) by Calendar Year.** Over the past decade, mean time to defibrillation among patients with VF and pulseless VT has not changed ( $P$  for trend = 0.08).

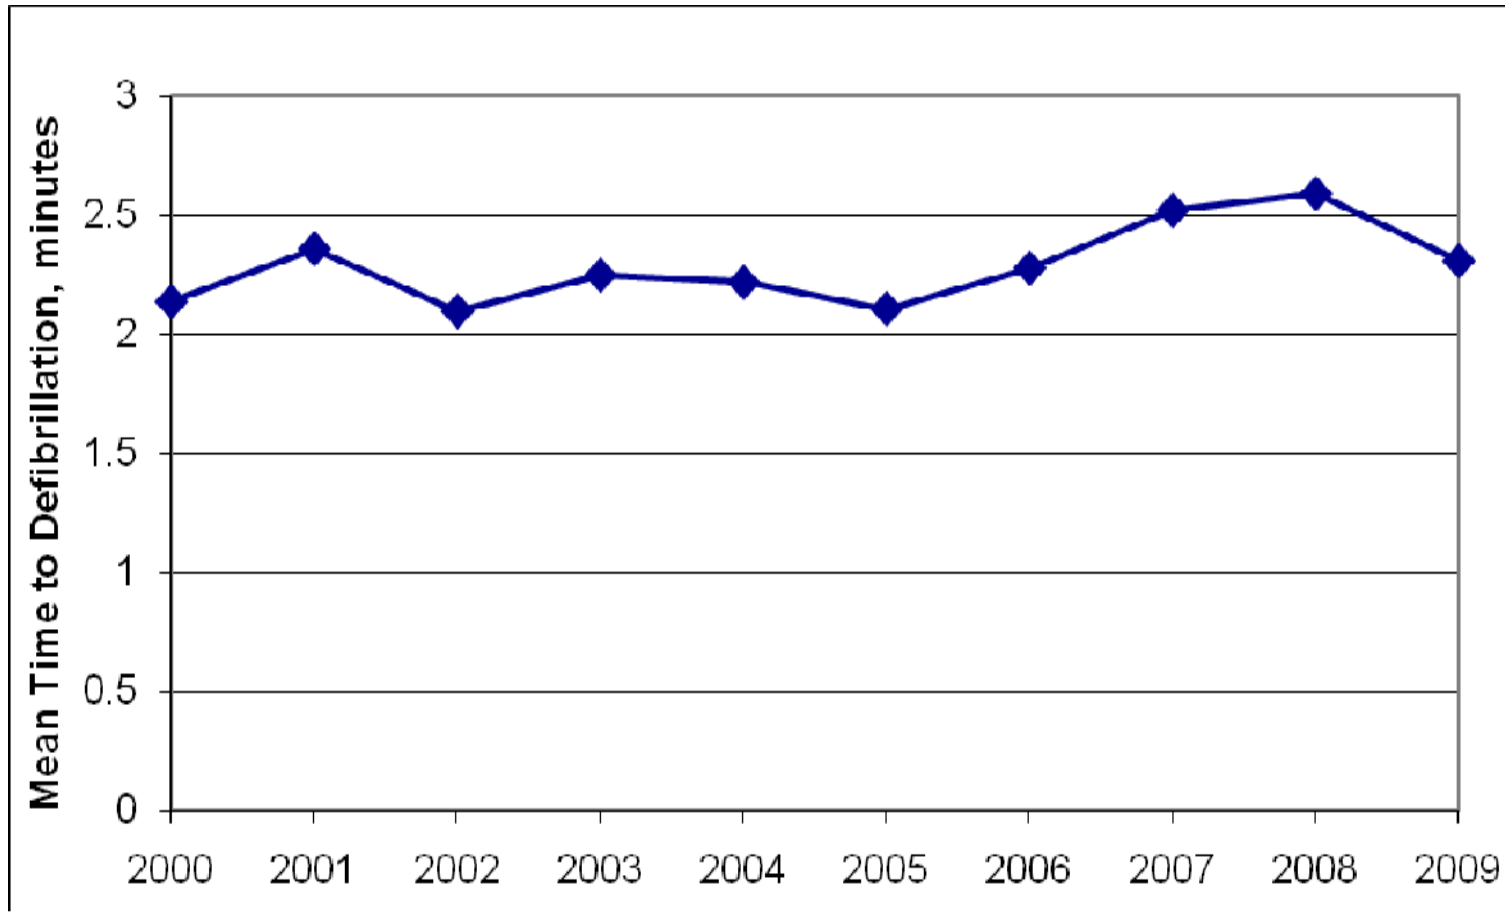

Supplement: NIHMS424600-supplement-supplement_1.pdf [file NIHMS424600-supplement-supplement_1.pdf]
